# Supplementary material
Source: ML conference proceedings conference paper supplement (https://openreview.net/forum?id=8rDbUoYc0p)
Supplement: supplementary_material [file attachment]

---

# A Constant-Factor Approximation for Individual Preference Stable Clustering

---

Anonymous Author(s)

Affiliation

Address

email

## Abstract

1 Individual preference (IP) stability, introduced by Ahmadi et al. (ICML 2022),  
2 is a natural clustering objective inspired by stability and fairness constraints. A  
3 clustering is  $\alpha$ -IP stable if the average distance of every data point to its own  
4 cluster is at most  $\alpha$  times the average distance to any other cluster. Unfortunately,  
5 determining if a dataset admits a 1-IP stable clustering is NP-Hard. Moreover,  
6 before this work, it was unknown if an  $o(n)$ -IP stable clustering always *exists*, as  
7 the prior state of the art only guaranteed an  $O(n)$ -IP stable clustering. We close this  
8 gap in understanding and show that an  $O(1)$ -IP stable clustering always exists for  
9 general metrics, and we give an efficient algorithm which outputs such a clustering.  
10 We also introduce generalizations of IP stability beyond average distance and give  
11 efficient near optimal algorithms in the cases where we consider the maximum and  
12 minimum distances within and between clusters.

## 13 1 Introduction

14 In applications involving and affecting people, socioeconomic concepts such as game theory, stability,  
15 and fairness are important considerations in algorithm design. Within this context, Ahmadi et al. [1]  
16 (ICML 2022) introduced the notion of *individual preference stability* (*IP stability*) for clustering.  
17 At a high-level, a clustering of an input dataset is called 1-IP stable if, for each individual point, its  
18 average distance to any other cluster is larger than the average distance to its own cluster. Intuitively,  
19 each individual prefers its own cluster to any other, and so the clustering is stable.

20 There are plenty of applications of clustering in which the utility of each individual in any cluster  
21 is determined according to the other individuals who belong to the same cluster. For example, in  
22 designing *personalized medicine*, the more similar the individuals in each cluster are, the more  
23 effective medical decisions, interventions, and treatments can be made for each group of patients.  
24 Similarly, stability guarantees are desired in designing personalized learning environments or market-  
25 ing campaigns to ensure that no individual wants to deviate from their assigned cluster. Furthermore  
26 the focus on individual utility in IP stability (a clustering is only stable if every individual is “happy”)  
27 enforces a notion of individual fairness in clustering.

28 In addition to its natural connections to cluster stability, algorithmic fairness, and Nash equilibria,  
29 IP stability is also algorithmically interesting in its own right. While clustering is well-studied with  
30 respect to global objective functions (e.g. the objectives of centroid-based clustering such as  $k$ -means  
31 or correlation/hierarchical clustering), less is known when the goal is to partition the dataset such that  
32 every point in the dataset is individually satisfied with the solution. Thus, IP stability also serves as a  
33 natural and motivated model of individual preferences in clustering.

## 34 1.1 Problem Statement and Preliminaries

35 The main objective of our clustering algorithms is to achieve IP stability given a set  $P$  of  $n$  points  
36 lying in a metric space  $(M, d)$  and  $k$ , the number of clusters.

37 **Definition 1.1** (Individual Preference (IP) Stability [1]). The goal is to find a disjoint  $k$ -clustering  
38  $\mathcal{C} = (C_1, \dots, C_k)$  of  $P$  such that every point, *on average*, is closer to the points of its own cluster  
39 than to the points in any other cluster. Formally, for all  $v \in P$ , let  $C(v)$  denote the cluster that  
40 contains  $v$ . We say that  $v \in P$  is IP stable with respect to  $\mathcal{C}$  if either  $C(v) = \{v\}$  or for every  $C' \in \mathcal{C}$   
41 with  $C' \neq C$ ,

$$\frac{1}{|C(v)| - 1} \sum_{u \in C(v)} d(v, u) \leq \frac{1}{|C'|} \sum_{u \in C'} d(v, u). \quad (1)$$

42 The clustering  $\mathcal{C}$  is 1-IP stable (or simply IP stable) if and only if every  $v \in P$  is stable with respect  
43 to  $\mathcal{C}$ .

44 Ahmadi et al. [1] showed that an arbitrary dataset may not admit an IP stable clustering. This can be  
45 the case even when  $n = 4$ . Furthermore, they proved that it is NP-hard to decide whether a given a  
46 set of points have an IP stable  $k$ -clustering, even for  $k = 2$ . This naturally motivates the study of the  
47 relaxations of IP stability.

48 **Definition 1.2** (Approximate IP Stability). A  $k$ -clustering  $\mathcal{C} = (C_1, \dots, C_k)$  of  $P$  is  $\alpha$ -approximate  
49 IP stable, or simply  $\alpha$ -IP stable, if for every point  $v \in P$ , the following holds: either  $C(v) = \{v\}$  or  
50 for every  $C' \in \mathcal{C}$  and  $C' \neq C$ ,

$$\frac{1}{|C(v)| - 1} \sum_{u \in C(v)} d(v, u) \leq \frac{\alpha}{|C'|} \sum_{u \in C'} d(v, u). \quad (2)$$

51 The work of [1] proposed algorithms to outputting IP stable clusterings on the one-dimensional line  
52 for any value of  $k$  and on tree metrics for  $k = 2$ . The first result implies an  $O(n)$ -IP stable clustering  
53 for general metrics, by applying a standard  $O(n)$ -distortion embedding to one-dimensional Euclidean  
54 space. In addition, they give a bicriteria approximation that discards an  $\varepsilon$ -fraction of the input points  
55 and outputs a  $O\left(\frac{\log^2 n}{\varepsilon}\right)$ -IP stable clustering for the remaining points.

56 Given the prior results, it is natural to ask if the  $O(n)$  factor for IP stable clustering given in [1] can  
57 be improved.

## 58 1.2 Our Results

59 **New Approximations.** Improving on the  $O(n)$ -IP stable algorithm in [1], we present a deterministic  
60 algorithm which for general metrics obtains an  $O(1)$ -IP stable  $k$ -clustering, for any value of  $k$ . Note  
61 that given the existence of instances without 1-IP stable clusterings, our approximation factor is  
62 optimal up to a constant factor.

63 **Theorem 1.3.** (*Informal; see Theorem 3.1*) Given a set  $P$  of  $n$  points in a metric space  $(M, d)$  and  
64 a number of desired clusters  $k \leq n$ , there exists an algorithm that computes an  $O(1)$ -IP stable  
65  $k$ -clustering of  $P$  in polynomial time.

66 Our algorithm outputs a clustering with an even stronger guarantee that we call uniform (approximate)  
67 IP stability. Specifically, for some global parameter  $r$  and for every point  $v \in P$ , the average distance  
68 from  $v$  to points in its own cluster is upper bounded by  $O(r)$  and the average distance from  $v$  to  
69 points in any other cluster is lower bounded by  $\Omega(r)$ . Note that the general condition of  $O(1)$ -IP  
70 stability would allow for a different value of  $r$  for each  $v$ .

71 We again emphasize that Theorem 1.3 implies that an  $O(1)$ -IP stable clustering always exists, where  
72 prior to this work, only the  $O(n)$  bound from [1] was known for general metrics.

73 **Additional  $k$ -center clustering guarantee.** The clustering outputted by our algorithm satisfies  
74 additional desirable properties beyond  $O(1)$ -IP stability. In the  $k$ -center problem, we are given  $n$   
75 points in a metric space, and our goal is to pick  $k$  centers as to minimize the maximal distance of  
76 any point to the nearest center. The clustering outputted by our algorithm from Theorem 1.3 has the

added benefit of being a constant factor approximation to the  $k$ -center problem in the sense that if the optimal  $k$ -center solution has value  $r_0$ , then the diameter of each cluster outputted by the algorithm is  $O(r_0)$ . In fact, we argue that IP stability is more meaningful when we also seek a solution that optimizes some clustering objective. If we only ask for IP stability, there are instances where it is easy to obtain  $O(1)$ -IP stable clusterings, but where such clusterings do not provide insightful information in a typical clustering application. Indeed, as we will show in Appendix B, randomly  $k$ -coloring the nodes of an unweighted, undirected graph (where the distance between two nodes is the number of edges on the shortest path between them), gives an  $O(1)$ -IP stable clustering when  $k \leq O\left(\frac{\sqrt{n}}{\log n}\right)$ . Our result on trees demonstrates the idiosyncrasies of individual objectives thus our work raises further interesting questions about studying standard global clustering objectives under the restriction that the solutions are also (approximately) IP stable.

**Max and Min-IP Stability.** Lastly, we introduce a notion of  $f$ -IP stability, generalizing IP stability.

**Definition 1.4** ( $f$ -IP Stability). Let  $(M, d)$  be a metric space,  $P$  a set of  $n$  points of  $M$ , and  $k$  the desired number of partitions. Let  $f : P \times 2^P \rightarrow \mathbb{R}^{\geq 0}$  be a function which takes in a point  $v \in P$ , a subset  $C$  of  $P$ , and outputs a non-negative real number. We say that a  $k$ -clustering  $\mathcal{C} = (C_1, \dots, C_k)$  of  $P$  is  $f$ -IP stable if for every point  $v \in P$ , the following holds: either  $C(v) = \{v\}$  or for every  $C' \in \mathcal{C}$  and  $C' \neq C$ ,

$$f(v, C(v) \setminus \{v\}) \leq f(v, C'). \quad (3)$$

Note that the standard setting of IP stability given in Definition 1.1 corresponds to the case where  $f(v, C) = (1/|C|) \times \sum_{v' \in C} d(v, v')$ . The formulation of  $f$ -IP stability, therefore, extends IP stability beyond average distances and allows for alternative objectives that may be more desirable in certain settings. For instance, in hierarchical clustering, average, minimum, and maximum distance measures are well-studied.

In particular, we focus on max-distance and min-distance in the definition of  $f$ -IP stable clustering in addition to average distance (which is just Definition 1.1), where  $f(v, C) = \max_{v' \in C} d(v, v')$  and  $f(v, C) = \min_{v' \in C} d(v, v')$ . We show that in both the max and min distance formulations, we can solve the corresponding  $f$ -IP stable clustering (nearly) optimally in polynomial time. We provide the following result:

**Theorem 1.5** (Informal; see Theorem 4.1 and Theorem 4.2). *In any metric space, Min-IP stable clustering can be solved optimally and Max-IP stable clustering can be solved approximately within a factor of 3, in polynomial time.*

We show that the standard greedy algorithm of  $k$ -center, a.k.a, the Gonzalez’s algorithm [15], yields a 3-approximate Max-IP stable clustering. Moreover, we present a conceptually clean algorithm which is motivated by considering the minimum spanning tree (MST) to output a Min-IP stable clustering. This implies that unlike the average distance formulation of IP stable clustering, a Min-IP stable clustering always exists. Both algorithms work in general metrics.

| Metric         | Approximation Factor | Reference        | Remark           |
|----------------|----------------------|------------------|------------------|
| 1D Line metric | 1                    | [1]              |                  |
| Weighted tree  | 1                    | [1]              | Only for $k = 2$ |
| General metric | $O(n)$               | [1]              |                  |
| General metric | $O(1)$               | <b>This work</b> |                  |

Table 1: Our results on IP stable  $k$ -clustering of  $n$  points. All algorithms run in polynomial time.

**Empirical Evaluations.** We experimentally evaluate our  $O(1)$ -IP stable clustering algorithm against  $k$ -means++, which is the empirically best-known algorithm in [1]. We also compare  $k$ -means++ with our optimal algorithm for Min-IP stability. We run experiments on the Adult data set<sup>1</sup> used by [1]. For IP stability, we also use four more datasets from UCI ML repository [11] and a synthetic data set designed to be a hard instance for  $k$ -means++. On the Adult data set, our algorithm performs slightly worse than  $k$ -means++ for IP stability. This is consistent with the empirical results

<sup>1</sup><https://archive.ics.uci.edu/ml/datasets/adult>; see [18].

118 of [1]. On the hard instance<sup>2</sup>, our algorithm performs better than  $k$ -means++, demonstrating that the  
 119 algorithm proposed in this paper is more robust than  $k$ -means++. Furthermore for Min-IP stability,  
 120 we empirically demonstrate that  $k$ -means++ can have an approximation factors which are up to a  
 121 factor of  $5x$  worse than our algorithm. We refer to Section 5 and Appendix C for more details.

### 122 1.3 Technical Overview

123 The main contribution is our  $O(1)$ -approximation algorithm for IP stable clustering for general  
 124 metrics. We discuss the proof technique used to obtain this result. Our algorithm comprises two  
 125 steps. We first show that for any radius  $r$ , we can find a clustering  $\mathcal{C} = (C_1, \dots, C_t)$  such that (a)  
 126 each cluster has diameter  $O(r)$ , and (b) the average distance from a point in a cluster to the points of  
 127 any other cluster is  $\Omega(r)$ .

128 Conditions (a) and (b) are achieved through a ball carving technique, where we iteratively pick centers  
 129  $q_i$  of distance  $> 6r$  to previous centers such that the radius  $r$  ball  $B(q_i, r)$  centered at  $q_i$  contains a  
 130 maximal number of points, say  $s_i$ . For each of these balls, we initialize a cluster  $D_i$  containing the  $s_i$   
 131 points of  $B(q_i, r)$ . We next consider the annulus  $B(q_i, 3r) \setminus B(q_i, 2r)$ . If this annulus contains less  
 132 than  $s_i$  points, we include all points from  $B(q_i, 3r)$  in  $D_i$ . Otherwise, we include *any*  $s_i$  points in  $D_i$   
 133 from the annulus. We assign each unassigned point to the *first* center picked by our algorithm and is  
 134 within distance  $O(r)$  to the point. This is a subtle but crucial component of the algorithm as the more  
 135 natural “assign to the closest center” approach fails to obtain  $O(1)$ -IP stability.

136 One issue remains. With this approach, we have no guarantee on the number of clusters. We solve  
 137 this by merging some of these clusters while still maintaining that the final clusters have radius  $O(r)$ .  
 138 This may not be possible for any choice of  $r$ . Thus the second step is to find the right choice of  $r$ . We  
 139 first run the greedy algorithm of  $k$ -center and let  $r_0$  be the minimal distance between centers we can  
 140 run the ball carving algorithm  $r = cr_0$  for a sufficiently small constant  $c$ . Then if we assign each  
 141 cluster of  $\mathcal{C}$  to its nearest  $k$ -center, we do indeed maintain the property that all clusters have diameter  
 142  $O(r)$ , and since  $c$  is a small enough constant, all the clusters will be non-empty. The final number  
 143 of clusters will therefore be  $k$ . As an added benefit of using the greedy algorithm for  $k$ -center as a  
 144 subroutine, we obtain that the diameter of each cluster is also  $O(r_0)$ , namely the output clustering is  
 145 a constant factor approximation to  $k$ -center.

### 146 1.4 Related Work

147 **Fair Clustering.** One of the main motivations of IP stable clustering is its interpretation as a notion  
 148 of individual fairness for clustering [1]. Individual fairness was first introduced by [12] for the  
 149 classification task, where, at high-level, the authors aim for a classifier that gives “similar predictions”  
 150 for “similar” data points. Recently, other formulations of individual fairness have been studied for  
 151 clustering [17, 2, 7, 8], too. [17] proposed a notion of fairness for centroid-based clustering: given  
 152 a set of  $n$  points  $P$  and the number of clusters  $k$ , for each point, a center must be picked among its  
 153  $(n/k)$ -th closest neighbors. The optimization variant of it was later studied by [19, 20, 24]. [7] studied  
 154 a pairwise notion of fairness in which data points represent people who gain some benefit from being  
 155 clustered together. In a subsequent work, [6] introduced a stochastic variant of this notion. [2] studied  
 156 the setting in which the output is a distribution over centers and “similar” points are required to have  
 157 “similar” centers distributions.

158 **Stability in Clustering.** Designing efficient clustering algorithms under notions of stability is a  
 159 well-studied problem<sup>3</sup>. Among the various notion of stability, *average stability* is the most relevant  
 160 to our model [4]. In particular, they showed that if there is a ground-truth clustering satisfying the  
 161 requirement of Equation (1) with an additive gap of  $\gamma > 0$ , then it is possible to recover the solution  
 162 in the list model where the list size is exponential in  $1/\gamma$ . Similar types of guarantees are shown in the  
 163 work by [9]. While this line of research mainly focuses on presenting faster algorithms utilizing the  
 164 strong stability conditions, the focus of IP stable clustering is whether we can recover such stability  
 165 properties in general instances, either exactly or approximately.

<sup>2</sup>The construction of this hard instance is available in the appendix of [1].

<sup>3</sup>For a comprehensive survey on this topic, refer to [3].

166 **Hedonic Games.** Another game-theoretic study of clustering is hedonic games [10, 5, 13]. In a  
 167 hedonic game, players choose to form coalitions (i.e., clusters) based on their utility. Our work differs  
 168 from theirs, since we do not model the data points as selfish players. In a related work, [23] proposes  
 169 another utility measure for hedonic clustering games on graphs. In particular, they define a closeness  
 170 utility, where the utility of node  $i$  in cluster  $C$  is the ratio between the number of nodes in  $C$  adjacent  
 171 to  $i$  and the sum of distances from  $i$  to other nodes in  $C$ . This measure is incomparable to IP stability.  
 172 In addition, their work focuses only on clustering in graphs while we consider general metrics.

## 173 2 Preliminaries and Notations

174 We let  $(M, d)$  denote a metric space, where  $d$  is the underlying distance function. We let  $P$  denote a  
 175 fixed set of points of  $M$ . Here  $P$  may contain multiple copies of the same point. For a given point  
 176  $x \in P$  and radius  $r \geq 0$ , we denote by  $B(x, r) = \{y \in P \mid d(x, y) \leq r\}$ , the ball of radius  $r$   
 177 centered at  $x$ . For two subsets  $X, Y \subseteq P$ , we denote by  $d(X, Y) = \inf_{x \in X, y \in Y} d(x, y)$ . Throughout  
 178 the paper,  $X$  and  $Y$  will always be finite and then the infimum can be replaced by a minimum. For  
 179  $x \in P$  and  $Y \subseteq P$ , we simply write  $d(x, Y)$  for  $d(\{x\}, Y)$ . Finally, for  $X \subseteq P$ , we denote by  
 180  $\text{diam}(X) = \sup_{x, y \in X} d(x, y)$ , the diameter of the set  $X$ . Again,  $X$  will always be finite, so the  
 181 supremum can be replaced by a maximum.

## 182 3 Constant-Factor IP Stable Clustering

183 In this section, we prove our main result: For a set  $P = \{x_1, \dots, x_n\}$  of  $n$  points with a metric  $d$   
 184 and every  $k \leq n$ , there exists a  $k$ -clustering  $\mathcal{C} = (C_1, \dots, C_k)$  of  $P$  which is  $O(1)$ -approximate IP  
 185 stable. Moreover, such a clustering can be found in time  $\tilde{O}(n^2 T)$ , where  $T$  is an upper bound on the  
 186 time it takes to compute the distance between two points of  $P$ .

187 **Algorithm** Our algorithm uses a subroutine, Algorithm 1, which takes as input  $P$  and a radius  $r \in \mathbb{R}$   
 188 and returns a  $t$ -clustering  $\mathcal{D} = (D_1, \dots, D_t)$  of  $P$  with the properties that (1) for any  $1 \leq i \leq t$ , the  
 189 maximum distance between any two points of  $D_i$  is  $O(r)$ , and (2) for any  $x \in P$  and any  $i$  such that  
 190  $x \notin D_i$ , the average distance from  $x$  to points of  $D_i$  is  $\Omega(r)$ . These two properties ensure that  $\mathcal{D}$   
 191 is  $O(1)$ -approximate IP stable. However, we have no control on the number of clusters  $t$  that the  
 192 algorithm produces. To remedy this, we first run a greedy  $k$ -center algorithm on  $P$  to obtain a set  
 193 of centers  $\{c_1, \dots, c_k\}$  and let  $r_0$  denote the maximum distance from a point of  $P$  to the nearest  
 194 center. We then run Algorithm 1 with input radius  $r = cr_0$  for some small constant  $c$ . This gives a  
 195 clustering  $\mathcal{D} = (D_1, \dots, D_t)$  where  $t \geq k$ . Moreover, we show that if we assign each cluster of  $\mathcal{D}$  to  
 196 the nearest center in  $\{c_1, \dots, c_k\}$  (in terms of the minimum distance from a point of the cluster to  
 197 the center), we obtain a  $k$ -clustering  $\mathcal{C} = (C_1, \dots, C_k)$  which is  $O(1)$ -approximate IP stable. The  
 198 combined algorithm is Algorithm 2.

199 We now describe the details of Algorithm 1. The algorithm takes as input  $n$  points  $x_1, \dots, x_n$  of a  
 200 metric space  $(M, d)$  and a radius  $r$ . It first initializes a set  $Q = \emptyset$  and then iteratively adds points  
 201  $x$  from  $P$  to  $Q$  that are of distance greater than  $6r$  from points already in  $Q$  such that  $|B(x, r)|$ ,  
 202 the number of points of  $P$  within radius  $r$  of  $x$ , is maximized. This is line 5–6 of the algorithm.  
 203 Whenever a point  $q_i$  is added to  $Q$ , we define the annulus  $A_i := B(q_i, 3r) \setminus B(q_i, 2r)$ . We further let  
 204  $s_i = |B(q_i, r)|$ . At this point the algorithm splits into two cases. If  $|A_i| \geq s_i$ , we initialize a cluster  
 205  $D_i$  which consists of the  $s_i$  points in  $B(q_i, r)$  and any arbitrarily chosen  $s_i$  points in  $A_i$ . This is line  
 206 8–9 of the algorithm. If on the other hand  $|A_i| < s_i$ , we define  $D_i := B(q_i, 3r)$ , namely  $D_i$  contains  
 207 all points of  $P$  within distance  $3r$  from  $q_i$ . This is line 10 of the algorithm. After iteratively picking  
 208 the points  $q_i$  and initializing the clusters  $D_i$ , we assign the remaining points as follows. For any point  
 209  $x \in P \setminus \bigcup_i D_i$ , we find the minimum  $i$  such that  $d(x, q_i) \leq 7r$  and assign  $x$  to  $D_i$ . This is line 13–16  
 210 of the algorithm. We finally return the clustering  $\mathcal{D} = (D_1, \dots, D_t)$ .

211 We next describe the details of Algorithm 2. The algorithm iteratively pick  $k$  centers  $c_1, \dots, c_k$  from  
 212  $P$  for each center maximizing the minimum distance to previously chosen centers. For each center  
 213  $c_i$ , it initializes a cluster, starting with  $C_i = \{c_i\}$ . This is line 4–7 of the algorithm. Letting  $r_0$  be  
 214 the minimum distance between pairs of distinct centers, the algorithm runs Algorithm 1 on  $P$  with  
 215 input radius  $r = r_0/15$  (line 8–9). This produces a clustering  $\mathcal{D}$ . In the final step, we iterate over  
 216 the clusters  $D$  of  $\mathcal{D}$ , assigning  $D$  to the  $C_i$  for which  $d(c_i, D)$  is minimized (line 11–13). We finally  
 217 return the clustering  $(C_1, \dots, C_k)$ .

---

**Algorithm 1** BALL-CARVING

---

```
1: Input: A set  $P = \{x_1, \dots, x_n\}$  of  $n$  points with a metric  $d$  and a radius  $r > 0$ .
2: Output: Clustering  $\mathcal{D} = (D_1, \dots, D_t)$  of  $P$ .
3:  $Q \leftarrow \emptyset, i \leftarrow 1$ 
4: while there exists  $x \in P$  with  $d(x, Q) > 6r$  do
5:    $q_i \leftarrow \arg \max_{x \in P: d(x, Q) > 6r} |B(x, r)|$ 
6:    $Q \leftarrow Q \cup \{q_i\}, s_i \leftarrow |B(q_i, r)|, A_i \leftarrow B(q_i, 3r) \setminus B(q_i, 2r)$ 
7:   if  $|A_i| \geq s_i$ 
8:      $S_i \leftarrow$  any set of  $s_i$  points from  $A_i$ 
9:      $D_i \leftarrow B(q_i, r) \cup S_i$ 
10:  else  $D_i \leftarrow B(q_i, 3r_i)$ 
11:   $i \leftarrow i + 1$ 
12: end while
13: for  $x \in P$  assigned to no  $D_i$  do
14:    $j \leftarrow \min\{i \mid d(x, q_i) \leq 7r\}$ 
15:    $D_j \leftarrow D_j \cup \{x\}$ 
16: end for
17:  $t \leftarrow |Q|$ 
18: return  $\mathcal{D} = (D_1, \dots, D_t)$ 
```

---

---

**Algorithm 2** IP-CLUSTERING

---

```
1: Input: Set  $P = \{x_1, \dots, x_n\}$  of  $n$  points with a metric  $d$  and integer  $k$  with  $2 \leq k \leq n$ .
2: Output:  $k$ -clustering  $\mathcal{C} = (C_1, \dots, C_k)$  of  $P$ .
3:  $S \leftarrow \emptyset$ 
4: for  $i = 1, \dots, k$  do
5:    $c_i \leftarrow \arg \max_{x \in P} \{d(x, S)\}$ 
6:    $S \leftarrow S \cup \{c_i\}, C_i \leftarrow \{c_i\}$ 
7: end for
8:  $r_0 \leftarrow \min\{d(c_i, c_j) \mid 1 \leq i < j \leq k\}$ 
9:  $\mathcal{D} \leftarrow \text{BALL-CARVING}(P, r_0/15)$ 
10: for  $D \in \mathcal{D}$  do
11:    $j \leftarrow \arg \min_i \{d(c_i, D)\}$ 
12:    $C_j \leftarrow C_j \cup D$ 
13: end for
14: return  $\mathcal{C} = (C_1, \dots, C_k)$ 
```

---

218 **Analysis** We now analyze our algorithm and provide its main guarantees.

219 **Theorem 3.1.** *Algorithm 2 returns an  $O(1)$ -approximate IP stable  $k$  clustering in time  $O(n^2T +$   
220  $n^2 \log n)$ . Furthermore, the solution is also a constant factor approximation to the  $k$ -center problem.*

221 In order to prove this theorem, we require the following lemma on Algorithm 1.

222 **Lemma 3.2.** *Let  $(D_1, \dots, D_t)$  be the clustering output by Algorithm 1. For each  $i \in [t]$ , the diameter  
223 of  $D_i$  is at most  $14r$ . Further, for  $x \in D_i$  and  $j \neq i$ , the average distance from  $x$  to points of  $D_j$  is at  
224 least  $\frac{r}{4}$ .*

225 Given Lemma 3.2, we can prove the the main result.

226 *Proof of Theorem 3.1.* We first argue correctness. As each  $c_i$  was chosen to maximize the minimal  
227 distance to points  $c_j$  already in  $S$ , for any  $x \in P$ , it holds that  $\min\{d(x, c_i) \mid i \in [k]\} \leq r_0$ .  
228 By Lemma 3.2, in the clustering  $\mathcal{D}$  output by BALL-CARVING( $P, r_0/15$ ) each cluster has diameter at  
229 most  $\frac{14}{15}r_0 < r_0$ , and thus, for each  $i \in [k]$ , the cluster  $D \in \mathcal{D}$  which contains  $c_i$  will be included in  
230  $C_i$  in the final clustering. Indeed, in line 11 of Algorithm 2,  $d(c_i, D) = 0$  whereas  $d(c_j, D) \geq \frac{1}{15}r_0$   
231 for all  $j \neq i$ . Thus, each cluster in  $(C_1, \dots, C_k)$  is non-empty. Secondly, the diameter of each cluster  
232 is at most  $4r_0$ , namely, for each two points  $x, x' \in C_i$ , they are both within distance  $r_0 + \frac{14}{15}r_0 < 2r_0$   
233 of  $c_i$ . Finally, by Lemma 3.2, for  $x \in D_i$  and  $j \neq i$ , the average distance from  $x$  to points of  $D_j$  is  
234 at least  $\frac{r_0}{60}$ . Since,  $\mathcal{C}$  is a coarsening of  $\mathcal{D}$ , i.e., each cluster of  $\mathcal{C}$  is the disjoint union of some of the

clusters in  $\mathcal{D}$ , it is straightforward to check that the same property holds for the clustering  $\mathcal{C}$ . Thus  $\mathcal{C}$  is  $O(1)$ -approximate IP stable.

We now analyze the running time. We claim that Algorithm 2 can be implemented to run in  $O(n^2T + n^2 \log n)$  time, where  $T$  is the time to compute the distance between any two points in the metric space. First, we can query all pairs to form the  $n \times n$  distance matrix  $A$ . Then we sort  $A$  along every row to form the matrix  $A'$ . Given  $A$  and  $A'$ , we easily implement our algorithms as follows.

First, we argue about the greedy  $k$ -center steps of Algorithm 2, namely, the for loop on line 4. The most straightforward implementation computes the distance from every point to new chosen centers. At the end, we have computed at most  $nk$  distances from points to centers which can be looked up in  $A$  in time  $O(nk) = O(n^2)$  as  $k \leq n$ . In line 8, we only look at every entry of  $A$  at most once so the total time is also  $O(n^2)$ . The same reasoning also holds for the for loop on line 10. It remains to analyze the runtime.

Given  $r$ , Alg. 1 can be implemented as follows. First, we calculate the size of  $|B(x, r)|$  for every point  $x$  in our dataset. This can easily be done by binary searching on the value of  $r$  along each of the (sorted) rows of  $A'$ , which takes  $O(n \log n)$  time in total. We can similarly calculate the sizes of  $|B(x, 2r)|$  and  $|B(x, 3r)|$ , and thus the number of points in the annulus  $|B(x, 3r) \setminus B(x, 2r)|$  in the same time to initialize the clusters  $D_i$ . Similar to the  $k$ -center reasoning above, we can also pick the centers in Algorithm 1 which are  $> 6r$  apart iteratively by just calculating the distances from points to the chosen centers so far. This costs at most  $O(n^2)$  time, since there are at most  $n$  centers. After initializing the clusters  $D_i$ , we finally need to assign the remaining unassigned points (line 13–16). This can easily be done in time  $O(n)$  per point, namely for each unassigned point  $x$ , we calculate its distance to each  $q_i$  assigning it to  $D_i$  where  $i$  is minimal such that  $d(x, q_i) \leq 7r$ . The total time for this is then  $O(n^2)$ . The  $k$ -center guarantees follow from our choice of  $r_0$  and Lemma 3.2.  $\square$

*Remark 3.3.* We note that the runtime can possibly be improved if we assume special structure about the metric space (e.g., Euclidean metric). See Appendix A for a discussion.

We now prove Lemma 3.2.

*Proof of Lemma 3.2.* The upper bound on the diameter of each cluster follows from the fact that for any cluster  $D_i$  in the final clustering  $\mathcal{D} = \{D_1, \dots, D_t\}$ , and any  $x \in D_i$ , it holds that  $d(x, q_i) \leq 7r$ . The main challenge is to prove the lower bound on the average distance from  $x \in D_i$  to  $D_j$  where  $j \neq i$ .

Suppose for contradiction that, there exists  $i, j$  with  $i \neq j$  and  $x \in D_i$  such that the average distance from  $x$  to  $D_j$  is smaller than  $r/4$ , i.e.,  $\frac{1}{|D_j|} \sum_{y \in D_j} d(x, y) < r/4$ . Then, it in particular holds that  $|B(x, r/2) \cap D_j| > |D_j|/2$ , namely the ball of radius  $r/2$  centered at  $x$  contains more than half the points of  $D_j$ . We split the analysis into two cases corresponding to the if-else statements in line 7–10 of the algorithm.

**Case 1:**  $|A_j| \geq s_j$ : In this case, cluster  $D_j$  consists of at least  $2s_j$  points, namely the  $s_j$  points in  $B(q_j, r)$  and the set  $S_j$  of  $s_j$  points in  $A_j$  assigned to  $D_j$  in line 8–9 of the algorithm. It follows from the preceding paragraph that,  $|B(x, r/2) \cap D_j| > s_j$ . Now, when  $q_j$  was added to  $Q$ , it was chosen as to maximize the number of points in  $B(q_j, r)$  under the constraint that  $q_j$  had distance greater than  $6r$  to previously chosen points of  $Q$ . Since  $|B(x, r)| > |B(x, r/2)| > |B(q_j, r)|$ , at the point where  $q_j$  was chosen,  $Q$  already contained some point  $q_{j_0}$  (with  $j_0 < j$ ) of distance at most  $6r$  to  $x$  and thus of distance at most  $7r$  to any point of  $B(x, r/2)$ . It follows that  $B(x, r/2) \cap D_j$  contains no point assigned during line 13–16 of the algorithm. Indeed, by the assignment rule, such a point  $y$  would have been assigned to either  $D_{j_0}$  or potentially an even earlier initialized cluster of distance at most  $7r$  to  $y$ . Thus,  $B(x, r/2) \cap D_j$  is contained in the set  $B(q_j, r) \cup S_j$ . However,  $|B(q_j, r)| = |S_j| = s_j$  and moreover, for  $(y_1, y_2) \in B(q_j, r) \times S_j$ , it holds that  $d(y_1, y_2) > r$ . In particular, no ball of radius  $r/2$  can contain more than  $s_j$  points of  $B(q_j, r) \cup S_j$ . As  $|B(x, r/2) \cap D_j| > s_j$ , this is a contradiction.

**Case 2:**  $|B(q_j, r)| < s_j$ : In this case,  $D_j$  includes all points in  $B(q_j, 3r)$ . As  $x \notin D_j$ , we must have that  $x \notin B(q_j, 3r)$  and in particular, the ball  $B(x, r/2)$  does not intersect  $B(q_j, r)$ . Thus,

$$|D_j| \geq |B(x, r/2) \cap D_j| + |B(q_j, r) \cap D_j| > |D_j|/2 + s_j,$$

so  $|D_j| > 2s_j$ , and finally,  $|B(x, r/2) \cap D_j| > |D_j|/2 > s_j$ . Similarly to case 1,  $B(x, r/2) \cap D_j$  contains no points assigned during line 13–16 of the algorithm. Moreover,  $B(x, r/2) \cap B(q_j, 3r) \subseteq A_j$ . In particular,  $B(x, r/2) \cap D_j \subseteq S_j$ , a contradiction as  $|S_j| = s_j$  but  $|B(x, r/2) \cap D_j| > s_j$ .  $\square$

## 4 Min and Max-IP Stable Clustering

The Min-IP stable clustering aims to ensure that for any point  $x$ , the *minimum* distance to a point in the cluster of  $x$  is at most the minimum distance to a point in any other cluster. We show that a Min-IP stable  $k$ -clustering always exists for any value of  $k \in [n]$  and moreover, can be found by a simple algorithm (Algorithm 3).

---

### Algorithm 3 MIN-IP-CLUSTERING

---

```

1: Input: Pointset  $P = \{x_1, \dots, x_n\}$  from a metric space  $(M, d)$  and integer  $k$  with  $2 \leq k \leq n$ .
2: Output:  $k$ -clustering  $\mathcal{C} = (C_1, \dots, C_k)$  of  $P$ .
3:  $L \leftarrow \{(x_i, x_j)\}_{1 \leq i < j \leq n}$  sorted according to  $d(x_i, x_j)$ 
4:  $E \leftarrow \emptyset$ 
5: while  $G = (P, E)$  has  $> k$  connected components do
6:    $e \leftarrow$  an edge  $e = (x, y)$  in  $L$  with  $d(x, y)$  minimal.
7:    $L \leftarrow L \setminus \{e\}$ 
8:   if  $e$  connects different connected components of  $G$  then  $E \leftarrow E \cup \{e\}$ 
9: end while
10: return the connected components  $(C_1, \dots, C_k)$  of  $G$ .

```

---

The algorithm is identical to Kruskal’s algorithm for finding a minimum spanning tree except that it stops as soon as it has constructed a forest with  $k$  connected components. First, it initializes a graph  $G = (V, E)$  with  $V = P$  and  $E = \emptyset$ . Next, it computes all distances  $d(x_i, x_j)$  between pairs of points  $(x_i, x_j)$  of  $P$  and sorts the pairs  $(x_i, x_j)$  according to these distances. Finally, it goes through this sorted list adding each edge  $(x_i, x_j)$  to  $E$  if it connects different connected components of  $G$ . After computing the distances, it is well known that this algorithm can be made to run in time  $O(n^2 \log n)$ , so the total running time is  $O(n^2(T + \log n))$  where  $T$  is the time to compute the distance between a single pair of points.

**Theorem 4.1.** *The  $k$ -clustering output by Algorithm 3 is a Min-IP stable clustering.*

*Proof.* Let  $\mathcal{C}$  be the clustering output by the algorithm. Conditions (1) and (2) in the definition of a min-stable clustering are trivially satisfied. To prove that (3) holds, let  $C \in \mathcal{C}$  with  $|C| \geq 2$  and  $x \in C$ . Let  $y_0 \neq x$  be a point in  $C$  such that  $(x, y_0) \in E$  (such an edge exists because  $C$  is the connected component of  $G$  containing  $x$ ) and let  $y_1$  be the closest point to  $x$  in  $P \setminus C$ . When the algorithm added  $(x, y_0)$  to  $E$ ,  $(x, y_1)$  was also a candidate choice of an edge between connected components of  $G$ . Since the algorithm chose the edge of minimal length with this property,  $d(x, y_0) \leq d(x, y_1)$ . Thus, we get the desired bound:

$$\min_{y \in C \setminus \{x\}} d(x, y) \leq d(x, y_0) \leq d(x, y_1) = \min_{y \in P \setminus C} d(x, y). \quad \square$$

**Theorem 4.2.** *The solution output by the greedy algorithm of  $k$ -center is a 3-approximate Max-IP stable clustering.*

*Proof.* To recall, the greedy algorithm of  $k$ -center (aka Gonzalez algorithm [15]) starts with an arbitrary point as the first center and then goes through  $k - 1$  iterations. In each iteration, it picks a new point as a center which is furthest from all previously picked centers. Let  $c_1, \dots, c_k$  denote the selected centers and let  $r := \max_{v \in P} d(v, \{c_1, \dots, c_k\})$ . Then, each point is assigned to the cluster of its closest center. We denote the constructed clusters as  $C_1, \dots, C_k$ . Now, for every  $i \neq j \in [k]$  and each point  $v \in C_i$ , we consider two cases:

- $d(v, c_i) \leq r/2$ .

$$\begin{aligned} \max_{u_i \in C_i} d(v, u_i) &\leq d(v, c_i) + d(u_i, c_i) \leq 3r/2, \\ \max_{u_j \in C_j} d(v, u_j) &\geq d(v, c_j) \geq d(c_i, c_j) - d(v, c_i) \geq r/2 \end{aligned}$$



318

- $d(v, c_i) > r/2$ .

$$\begin{aligned} \max_{u_i \in C_i} d(v, u_i) &\leq d(v, c_i) + d(u_i, c_i) \leq 3d(v, c_i), \\ \max_{u_j \in C_j} d(v, u_j) &\geq d(v, c_j) \geq d(v, c_i). \end{aligned}$$

319 In both cases,  $\max_{u_i \in C_i} d(v, u_i) \leq 3 \max_{u_j \in C_j} d(v, u_j)$ . □320 

## 5 Experiments

321 While the goal and the main contributions of our paper are mainly theoretical, we also implement our  
 322 optimal Min-IP clustering algorithm as well as extend the experimental results for IP stable clustering  
 323 given in [1]. Our experiments demonstrate that our optimal Min-IP stable clustering algorithm is  
 324 superior to  $k$ -means++, the strongest baseline in [1], and show that our IP clustering algorithm for  
 325 average distances is practical on real world datasets and is competitive to  $k$ -means++ (which fails  
 326 to find good stable clusterings in the worst case [1]). We give our experimental results for Min-IP  
 327 stability and defer the rest of the empirical evaluations to Section C. All experiments were performed  
 328 in Python 3. The results shown below are an average of 10 runs for  $k$ -means++.

329 **Metrics** We measure the quality of a clustering using the same metrics used in [1] for standard-  
 330 ization. Considering the question of  $f$ -IP stability (Definition 1.4), let the violation of a point  $x$  be  
 331 defined as  $\text{Vi}(x) = \max_{C_i \neq C(x)} \frac{f(x, C(x) \setminus \{x\})}{f(x, C_i)}$ .

332 For example, setting  $f(x, C) = \sum_{y \in C} d(x, y)/|C|$  corresponds to the standard IP stability objective  
 333 and  $f(x, C) = \min_{y \in C} d(x, y)$  is the Min-IP formulation. Note point  $x$  is stable iff  $\text{Vi}(x) \leq 1$ .

334 We measure the extent to which a  $k$ -clustering  $\mathcal{C} = (C_1, \dots, C_k)$  of  $P$  is (un-)stable by comput-  
 335 ing  $\text{MaxVi} = \max_{x \in P} \text{Vi}(x)$  (i.e. maximum violation) and  $\text{MeanVi} = \sum_{x \in P} \text{Vi}(x)/|P|$  (mean  
 336 violation).

337 **Results** For Min-IP stability, we have an optimal algorithm; it always return a stable clustering for  
 338 all  $k$ . We see in Figures 1 that for the max and mean violation metrics, our algorithm outperforms  
 339  $k$ -means++ by up to a factor of **5x**, consistently across various values of  $k$ .  $k$ -means++ can return a  
 340 much worse clustering under Min-IP stability on real data, motivating the use of our theoretically-  
 341 optimal algorithm in practice.

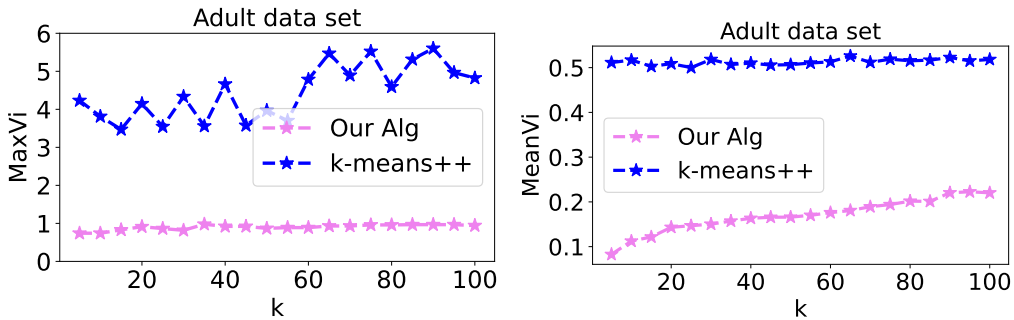

Figure 1: Maximum and mean violation for Min-IP stability for the Adult dataset, as used in [1]; lower values are better.

342 

## 6 Conclusion

343 We presented a deterministic polynomial time algorithm which provides an  $O(1)$ -approximate  
 344 IP stable clustering of  $n$  points in a general metric space, improving on prior works which only  
 345 guaranteed an  $O(n)$ -approximate IP stable clustering. We also generalized IP stability to  $f$ -stability  
 346 and provided an algorithm which finds an exact Min-IP stable clustering and a 3-approximation for  
 347 Max-IP stability, both of which hold for all  $k$  and in general metric spaces.

## References

- [1] Saba Ahmadi, Pranjal Awasthi, Samir Khuller, Matthäus Kleindessner, Jamie Morgenstern, Pat-tara Sukprasert, and Ali Vakilian. Individual preference stability for clustering. In *International Conference on Machine Learning (ICML)*, 2022.
- [2] Nihesh Anderson, Suman K Bera, Syamantak Das, and Yang Liu. Distributional individual fairness in clustering. *arXiv preprint arXiv:2006.12589*, 2020.
- [3] P. Awasthi and M.-F. Balcan. Center based clustering: A foundational perspective. In *Handbook of Cluster Analysis*. CRC Press, 2014.
- [4] Maria-Florina Balcan, Avrim Blum, and Santosh Vempala. A discriminative framework for clustering via similarity functions. In *Symposium on Theory of computing (STOC)*, pages 671–680, 2008.
- [5] Anna Bogomolnaia and Matthew O Jackson. The stability of hedonic coalition structures. *Games and Economic Behavior*, 38(2):201–230, 2002.
- [6] B Brubach, D Chakrabarti, J Dickerson, A Srinivasan, and L Tsepenekas. Fairness, semi-supervised learning, and more: A general framework for clustering with stochastic pairwise constraints. In *AAAI Conference on Artificial Intelligence (AAAI)*, 2021.
- [7] Brian Brubach, Darshan Chakrabarti, John Dickerson, Samir Khuller, Aravind Srinivasan, and Leonidas Tsepenekas. A pairwise fair and community-preserving approach to k-center clustering. In *International Conference on Machine Learning (ICML)*, pages 1178–1189, 2020.
- [8] Darshan Chakrabarti, John P Dickerson, Seyed A Esmaili, Aravind Srinivasan, and Leonidas Tsepenekas. A new notion of individually fair clustering:  $\alpha$ -equitable  $k$ -center. In *International Conference on Artificial Intelligence and Statistics*, pages 6387–6408. PMLR, 2022.
- [9] Amit Daniely, Nati Linial, and Michael Saks. Clustering is difficult only when it does not matter. *arXiv preprint arXiv:1205.4891*, 2012.
- [10] Jacques H Dreze and Joseph Greenberg. Hedonic coalitions: Optimality and stability. *Econometrica: Journal of the Econometric Society*, pages 987–1003, 1980.
- [11] D. Dua and C. Graff. UCI machine learning repository, 2019. Adult data set available on <https://archive.ics.uci.edu/ml/datasets/adult>. Breast Cancer Wisconsin data set available on [https://archive.ics.uci.edu/ml/datasets/breast+cancer+wisconsin+\(diagnostic\)](https://archive.ics.uci.edu/ml/datasets/breast+cancer+wisconsin+(diagnostic)). Car Evaluation data set available on <https://archive.ics.uci.edu/ml/datasets/Car+Evaluation>. Drug Consumption data set available on [https://archive.ics.uci.edu/ml/datasets/Drug+consumption+\(quantified\)](https://archive.ics.uci.edu/ml/datasets/Drug+consumption+(quantified)). Indian Liver Patient data set available on [https://archive.ics.uci.edu/ml/datasets/ILPD+\(Indian+Liver+Patient+Dataset\)](https://archive.ics.uci.edu/ml/datasets/ILPD+(Indian+Liver+Patient+Dataset)).
- [12] Cynthia Dwork, Moritz Hardt, Toniann Pitassi, Omer Reingold, and Richard Zemel. Fairness through awareness. In *Innovations in Theoretical Computer Science (ITCS)*, pages 214–226, 2012.
- [13] Edith Elkind, Angelo Fanelli, and Michele Flammini. Price of pareto optimality in hedonic games. *Artificial Intelligence*, 288:103357, 2020.
- [14] E. Fehrman, A. K. Muhammad, E. M. Mirkes, V. Egan, and A. N. Gorban. The five factor model of personality and evaluation of drug consumption risk, 2017.
- [15] Teofilo F Gonzalez. Clustering to minimize the maximum intercluster distance. *Theoretical computer science*, 38:293–306, 1985.
- [16] Piotr Indyk and Sandeep Silwal. Faster linear algebra for distance matrices. In *Neural Information Processing Systems (NeurIPS)*, 2022.
- [17] C. Jung, S. Kannan, and N. Lutz. A center in your neighborhood: Fairness in facility location. In *Symposium on Foundations of Responsible Computing (FORC)*, 2020.

- 395 [18] Ron Kohavi et al. Scaling up the accuracy of naive-bayes classifiers: A decision-tree hybrid. In  
396 *Kdd*, volume 96, pages 202–207, 1996.
- 397 [19] S. Mahabadi and A. Vakilian. Individual fairness for  $k$ -clustering. In *International Conference*  
398 *on Machine Learning (ICML)*, 2020.
- 399 [20] Maryam Negahbani and Deeparnab Chakrabarty. Better algorithms for individually fair  $k$ -  
400 clustering. *Advances in Neural Information Processing Systems (NeurIPS)*, 34:13340–13351,  
401 2021.
- 402 [21] F. Pedregosa, G. Varoquaux, A. Gramfort, V. Michel, B. Thirion, O. Grisel, M. Blondel,  
403 P. Prettenhofer, R. Weiss, V. Dubourg, J. Vanderplas, A. Passos, D. Cournapeau, M. Brucher,  
404 M. Perrot, and E. Duchesnay. Scikit-learn: Machine learning in Python. *Journal of Machine*  
405 *Learning Research*, 12:2825–2830, 2011.
- 406 [22] Jack Snoeyink. Point location. In Jacob E. Goodman and Joseph O’Rourke, editors, *Handbook*  
407 *of Discrete and Computational Geometry, Second Edition*, pages 767–785. Chapman and  
408 Hall/CRC, 2004.
- 409 [23] Ana-Andreea Stoica and Christos Papadimitriou. Strategic clustering. 2018.
- 410 [24] A. Vakilian and M. Yalciner. Improved approximation algorithms for individually fair clustering.  
411 In *International Conference on Artificial Intelligence and Statistics (AISTATS)*, 2022.

## A Discussion on the Runtime of Algorithm 2

We remark that the runtime of our  $O(1)$ -approximate IP-stable clustering algorithm can potentially be improved if we assume special structure about the metric space, such as a tree or Euclidean metric. In special cases, we can improve the running time by appealing to particular properties of the metric which allow us to either calculate distances or implement our subroutines faster. For example for tree metrics, all distances can be calculated in  $O(n^2)$  time, even though  $T = O(n)$ . Likewise for the Euclidean case, we can utilize specialized algorithms for computing the all pairs distance matrix, which obtain speedups over the naive methods [16], or use geometric point location data structures to quickly compute quantities such as  $|B(x, r)|$  [22]. Our presentation is optimized for simplicity and generality so detailed discussions of specific metric spaces are beyond the scope of the work.

## B Random Clustering in Unweighted Graphs

In this appendix, we show that for unweighted, undirected, graphs (where the distance  $d(u, v)$  between two vertices  $u$  and  $v$  is the length of the shortest path between them), randomly  $k$ -coloring the nodes gives an  $O(1)$ -approximate IP-stable clustering whenever  $k = O(n^{1/2}/\log n)$ .

We start with the following lemma.

**Lemma B.1.** *Let  $\gamma = O(1)$  be a constant. There exists a constant  $c > 0$  (depending on  $\gamma$ ) such that the following holds: Let  $T = (V, E)$  be an unweighted tree on  $n$  nodes rooted at vertex  $r$ . Suppose that we randomly  $k$ -color the nodes of  $T$ . Let  $V_i \subseteq V$  be the nodes of color  $i$ , let  $X_i = \sum_{v \in V_i} d(r, v)$ , and let  $X = \sum_{v \in V} d(r, v)$ . If  $k \leq c \frac{\sqrt{n}}{\log n}$ , then with probability  $1 - O(n^{-\gamma})$ , it holds that  $X/2 \leq kX_i \leq 2X$  for all  $i \in [k]$ .*

*Proof.* We will fix  $i$ , and prove that the bound  $X/2 \leq X_i \leq 2X$  holds with probability  $1 - O(n^{-\gamma-1})$ . Union bounding over all  $i$  then gives the desired result. Let  $\Delta = \max_{v \in V} d(r, v)$  be the maximum distance from the root to any vertex of the tree. We may assume that  $\Delta \geq 5$  as otherwise the result follows directly from a simple Chernoff bound. Since the tree is unweighted and there exists a node  $v$  of distance  $\Delta$  to  $r$ , there must also exist nodes of distances  $1, 2, \dots, \Delta - 1$  to  $r$ , namely the nodes on the path from  $r$  to  $v$ . For the remaining nodes, we know that the distance is at least 1. Therefore,

$$\sum_{v \in V} d(r, v) \geq (n - \Delta - 1) + \sum_{j=1}^{\Delta} j = n + \binom{\Delta}{2} - 1 \geq n + \frac{\Delta^2}{3},$$

and so  $\mu_i = \mathbb{E}[X_i] \geq \frac{n + \Delta^2/3}{k}$ . Since the variables  $(d(r, v) \mathbb{1}_{v \in V_i})_{v \in V}$  sum to  $X_i$  and are independent and bounded by  $\Delta$ , it follows by a Chernoff bound that for any  $0 \leq \delta \leq 1$ ,

$$\Pr[|X_i - \mu_i| \geq \delta \mu_i] \leq 2 \exp\left(-\frac{\delta^2 \mu_i}{3\Delta}\right).$$

By the AM-GM inequality,

$$\frac{\mu_i}{\Delta} \geq \frac{1}{k} \left( \frac{n}{\Delta} + \frac{\Delta}{3} \right) \geq \frac{2\sqrt{n}}{\sqrt{3}k}.$$

Putting  $\delta = 1/2$ , the bound above thus becomes

$$\begin{aligned} \Pr[|X_i - \mu_i| \geq \frac{\mu_i}{3}] &\leq 2 \exp\left(-\frac{\sqrt{n}}{6\sqrt{3}k}\right) \\ &\leq 2 \exp\left(-\frac{\sqrt{n}}{11k}\right) \leq 2n^{-\frac{1}{11c}}, \end{aligned}$$

where the last bound uses the assumption on the magnitude of  $k$  in the lemma. Choosing  $c = \frac{1}{11(\gamma+1)}$ , the desired result follows.  $\square$

Next, we state our result on the  $O(1)$ -approximate IP-stability for randomly colored graphs.

**Theorem B.2.** Let  $\gamma = O(1)$  and  $k \leq c \frac{\sqrt{n}}{\log n}$  for a sufficiently small constant  $c$ . Let  $G = (V, E)$  be an unweighted, undirected graph on  $n$  nodes, and suppose that we  $k$ -color the vertices of  $G$  randomly. Let  $V_i$  denote the nodes of color  $i$ . With probability at least  $1 - n^{-\gamma}$ ,  $(V_1, \dots, V_k)$  forms an  $O(1)$ -approximate IP-clustering.

*Proof.* Consider a node  $u$  and let  $X_i = \sum_{v \in V_i \setminus \{u\}} d(u, v)$ . Note that the distances  $d(u, v)$  are exactly the distances in a breadth first search tree rooted at  $u$ . Thus, by Lemma B.1, the  $X_i$ 's are all within a constant factor of each other with probability  $1 - O(n^{-\gamma-1})$ . Moreover, a simple Chernoff bound shows that with the same high probability,  $|V_i| = \frac{n}{k} + O\left(\sqrt{\frac{n \log n}{k}}\right) = \Theta\left(\frac{n}{k}\right)$  for all  $i \in [k]$ . In particular, the values  $Y_i = \frac{X_i}{|V_i|}$  for  $i \in [k]$  also all lie within a constant factor of each other which implies that  $u$  is  $O(1)$ -stable in the clustering  $(V_1, \dots, V_k)$ . Union bounding over all nodes  $u$ , we find that with probability  $1 - O(n^{-\gamma})$ ,  $(V_1, \dots, V_k)$  is an  $O(1)$ -approximate IP-clustering.  $\square$

**Remark B.3.** The assumed upper bound on  $k$  in Theorem B.2 is necessary (even in terms of  $\log n$ ). Indeed, consider a tree  $T$  which is a star  $S$  on  $n - k \log k$  vertices along with a path  $P$  of length  $k \log k$  having one endpoint at the center  $v$  of the star. With probability  $\Omega(1)$ , some color does not appear on  $P$ . We refer to this color as color 1. Now consider the color of the star center. With probability at least  $9/10$ , say, this color is different from 1 and appears  $\Omega(\log k)$  times on  $P$  with average distance  $\Omega(k \log k)$  to the star center  $v$ . Let the star center have color 2. With high probability, each color appears  $\Theta(n/k)$  times in  $S$ . Combining these bounds, we find that with constant probability, the average distance from  $v$  to vertices of color 1 is  $O(1)$ , whereas the average distance from  $v$  to vertices of color 2 is  $\Omega\left(1 + \frac{k^2 (\log k)^2}{n}\right)$ . In particular for the algorithm to give an  $O(1)$ -approximate IP-stable clustering, we need to assume that  $k = O\left(\frac{\sqrt{n}}{\log n}\right)$ .

## C Additional Empirical Evaluations

We implement our  $O(1)$ -approximation algorithm for IP-clustering. These experiments extend those of [1] and confirm their experimental findings:  $k$ -means++ is a strong baseline for IP-stable clustering. Nevertheless, our algorithm is competitive with it while guaranteeing robustness against worst-case datasets, a property which  $k$ -means++ does not possess.

Our datasets are the following. There are three datasets from [11] used in [1], namely, Adult, Drug [14], and IndianLiver. We also add two additional datasets from UCI Machine Learning Repository [11], namely, BreastCancer and Car. For IP-clustering, we also consider a synthetic dataset which is the hard instance for  $k$ -means++ given in [1].

Our goal is to show that our IP-clustering algorithm is practical and in real world datasets, is competitive with respect to  $k$ -means++, which was the best algorithm in the experiments in [1]. Furthermore, our algorithm is robust and outperform  $k$ -means++ for worst case datasets.

As before, all experiments were performed in Python 3. We use the  $k$ -means++ implementation of Scikit-learn package [21]. We note that in the default implementation in Scikit-learn,  $k$ -means++ is initiated many times with different centroid seeds. The output is the best of 10 runs by default. As we want to have control of this behavior, we set the parameter `n_init=1` and then compute the average of many different runs.

Additionally to the metrics used in the main experimental section, we also compute the number of unstable points, defined as the size of the set  $U = \{x \in M : x \text{ is not stable}\}$ . In terms of clustering qualities, we additionally measure three quantities. First, we measure “cost”, which is the average within-cluster distances. Formally,  $Cost = \sum_{i=1}^k \frac{1}{\binom{|C_i|}{2}} \sum_{x, y \in C_i, x \neq y} d(x, y)$ . We then measure  $k$ -center costs, defined as the maximum distances from any point to its center. Here, centers are given naturally from  $k$ -means++ and our algorithm. Finally,  $k$ -means costs, defined as  $k\text{-means-cost} = \sum_{i=1}^k \frac{1}{|C_i|} \sum_{x, y \in C_i, x \neq y} d(x, y)^2$ .

## 490 C.1 Hard Instance for $k$ -means++ for IP-Stability

491 We briefly describe the hard instance for  $k$ -means++ for the standard IP-stability formulation given  
 492 in [1]; see their paper for full details. The hard instance consists of a gadget of size 4. In the seed-  
 493 finding phase of  $k$ -means++, if it incorrectly picks two centers in the gadget, then the final clustering  
 494 is not  $\beta$ -approximate IP-stable, where  $\beta$  is a configurable parameter. The instance for  $k$ -clustering is  
 495 produced by concatenating these gadgets together. In such an instance, with a constant probability,  
 496 the clustering returned by  $k$ -means++ is not  $\beta$ -approximate IP-stable and in particular. We remark  
 497 that the proof of Theorem 2 in [1] easily implies that  $k$ -means++ cannot have an approximation factor  
 498 better than  $n^c$  for some absolute constant  $c > 0$ , i.e., we can insure  $\beta = \Omega(n^c)$ . Here, we test both  
 499 our algorithm and  $k$ -means++ in an instance with 8,000 points (for  $k = 2,000$  clusters).

500 **IP-Stability results** We first discuss five real dataset. We tested the algorithms for the range of  $k$   
 501 up to 25. The result in Figures 2 and 3 is consistent with the experiments in the previous paper as we  
 502 see that  $k$ -means++ is a very competitive algorithm for these datasets. For small number of clusters,  
 503 our algorithm sometimes outperforms  $k$ -means++. We hypothesize that on these datasets, especially  
 504 for large  $k$ , clusters which have low  $k$ -means cost separate the points well and therefore are good  
 505 clusters for IP-stability.

506 Next we discuss the  $k$ -means++ hard instance. The instance used in Figure 3 was constructed with  
 507  $\beta = 50$ . We vary  $k$  but omit the results for higher  $k$  values since the outputs from both algorithms are  
 508 stable. We remark that the empirical results with different  $\beta$  gave qualitatively similar results. For  
 509 maximum and mean violation, our algorithm outperforms  $k$ -means++ (Figure 3).

## 510 D Future Directions

511 There are multiple natural open questions following our work.

- 512 • Note that in some cases,  $\alpha$ -IP stable clusterings for  $\alpha < 1$  may exist. On the other hand, in  
 513 the hard example on  $n = 4$  from [1], we know that there some constant  $C > 1$  such that  
 514 no  $C$ -IP stable clustering exists. For a given input, let  $\alpha^*$  be the minimum value such that  
 515 a  $\alpha^*$ -IP stable clustering exists. Is there an efficient algorithm which returns an  $O(\alpha^*)$ -IP  
 516 stable clustering? Note that our algorithm satisfies this for  $\alpha = \Omega(1)$ . An even stronger  
 517 result would be to find a PTAS which returns a  $(1 + \varepsilon)\alpha^*$ -IP stable clustering.
- 518 • For what specific metrics (other than the line or tree metrics with  $k = 2$ ) can we get 1-IP  
 519 stable clusterings efficiently?
- 520 • In addition to stability, it is desirable that a clustering algorithm also achieves strong global  
 521 welfare guarantee. Our algorithm gives constant approximation for  $k$ -center. What about  
 522 other metrics, such as  $k$ -means?

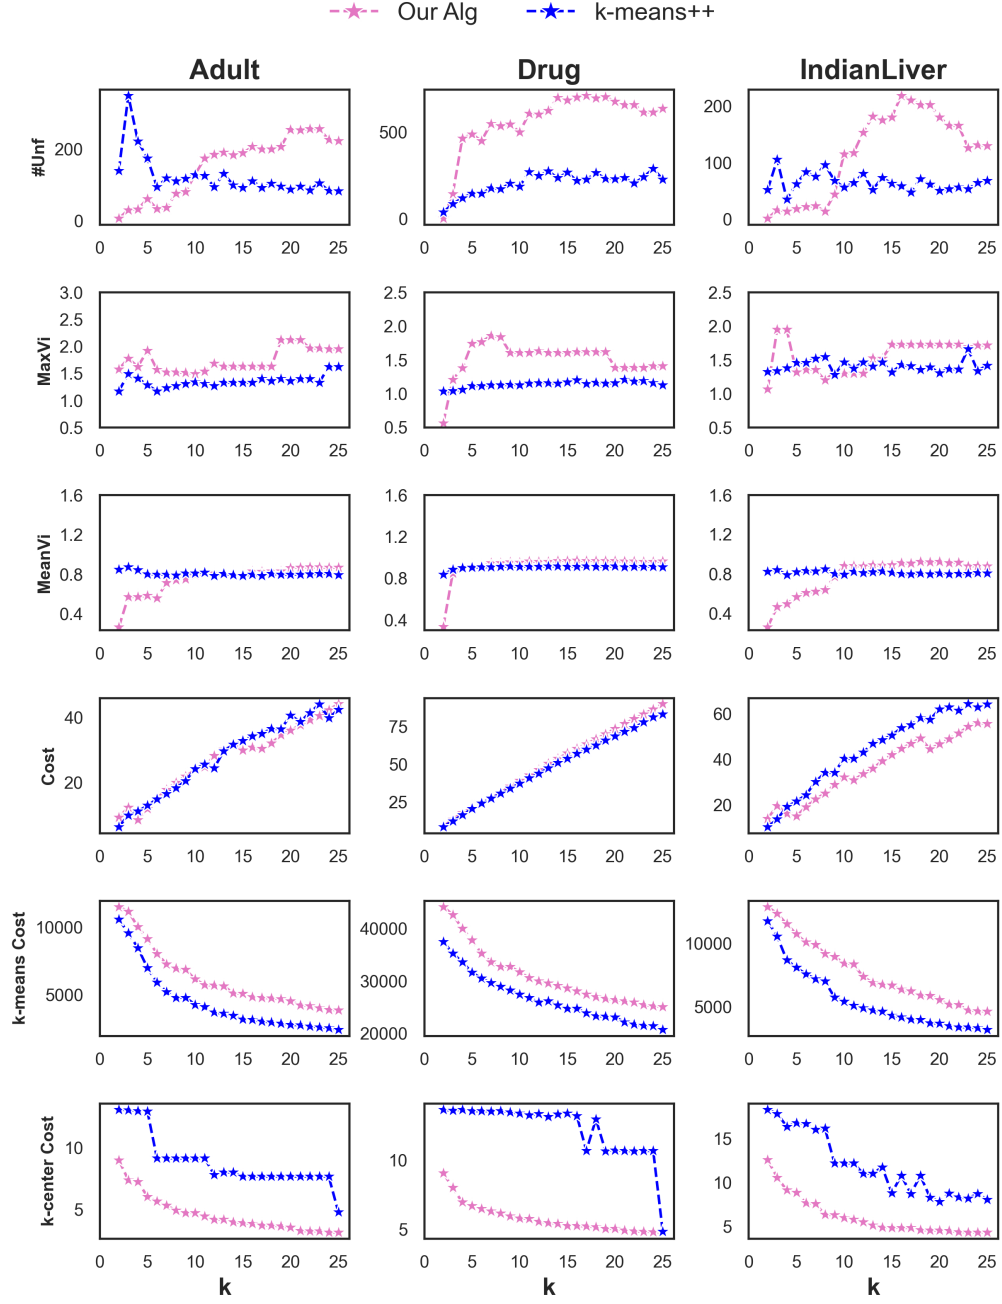

Figure 2: Experiment results on three datasets used in [1].

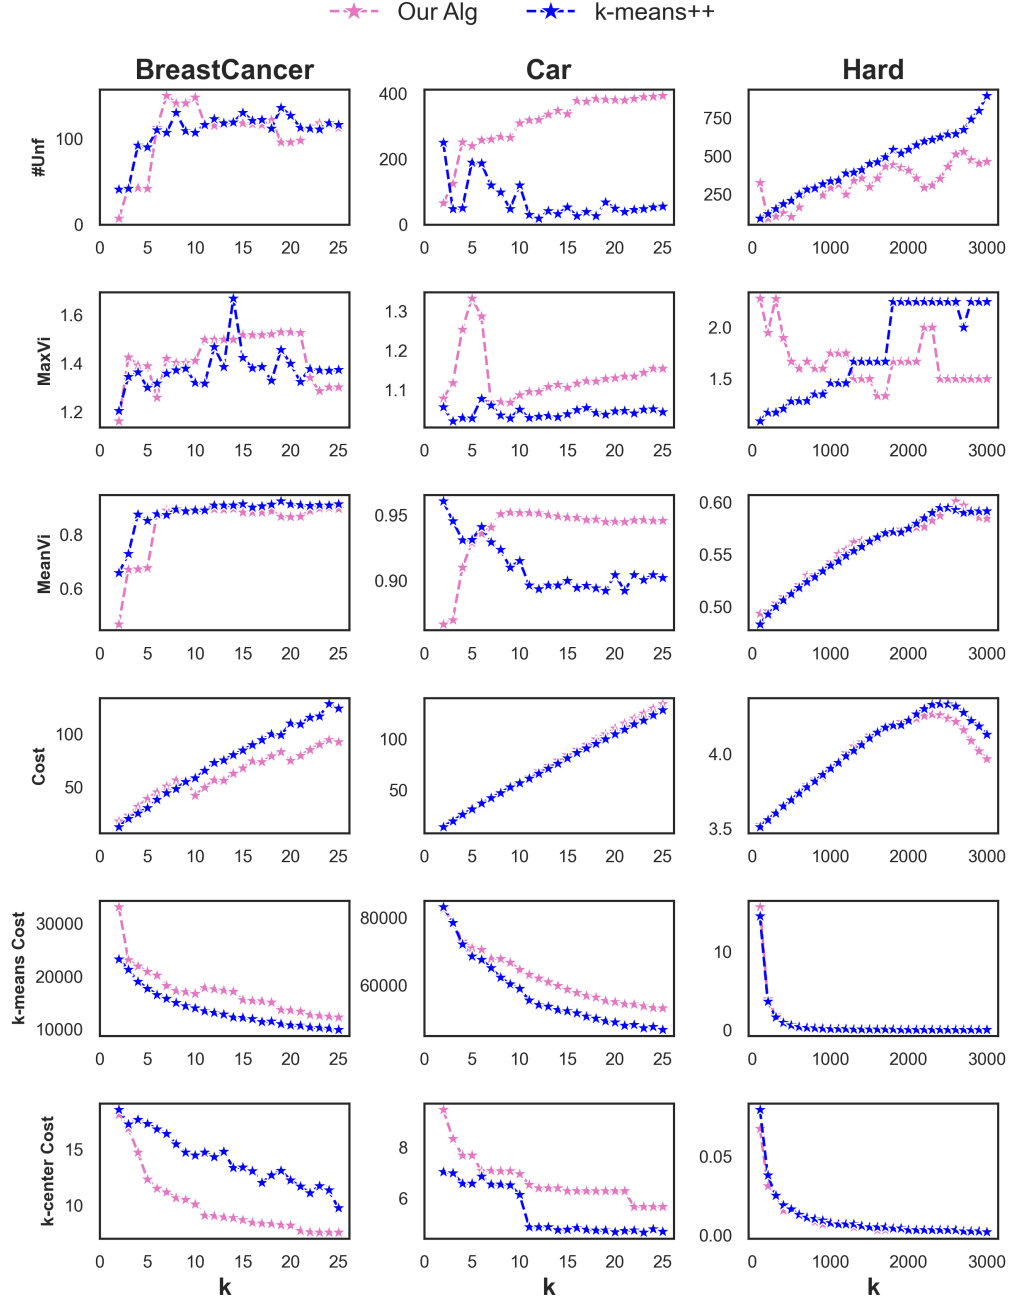

Figure 3: Additional experiment results on two real datasets and the synthetic dataset.
